# Supplementary material for: Adducts of Carbon Black with a Biosourced Janus Molecule for Elastomeric Composites with Lower Dissipation of Energy
Source: MDPI journal article supplement (doi:10.3390/polym15143120), 2023-07-22
Supplement: s1 [file s1]

# Adducts of Carbon Black with a Biosourced Janus Molecule for Elastomeric Composites with Lower Dissipation of Energy

Federica Magaletti, Fatima Margani, Alessandro Monti, Roshanak Dezyani,  
Gea Prioglio, Ulrich Giese, Vincenzina Barbera and Maurizio Galimberti

## Supplementary material

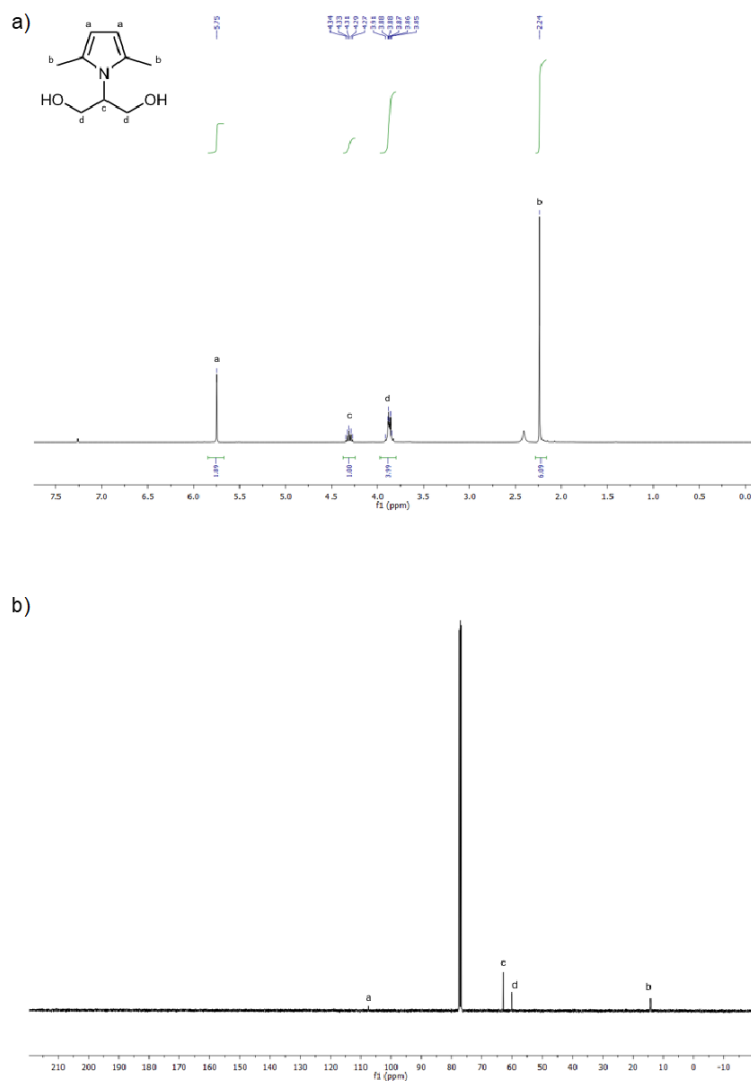

**Figure S1.**  $^1\text{H}$  (a,  $\text{CDCl}_3$ , 400 MHz) and  $^{13}\text{C}$  (b,  $\text{CDCl}_3$ , 100 MHz) NMR spectra of 2-(2,5-dimethyl-1*H*-pyrrol-1-yl)-1,3-propanediol (serinol pyrrole, SP).

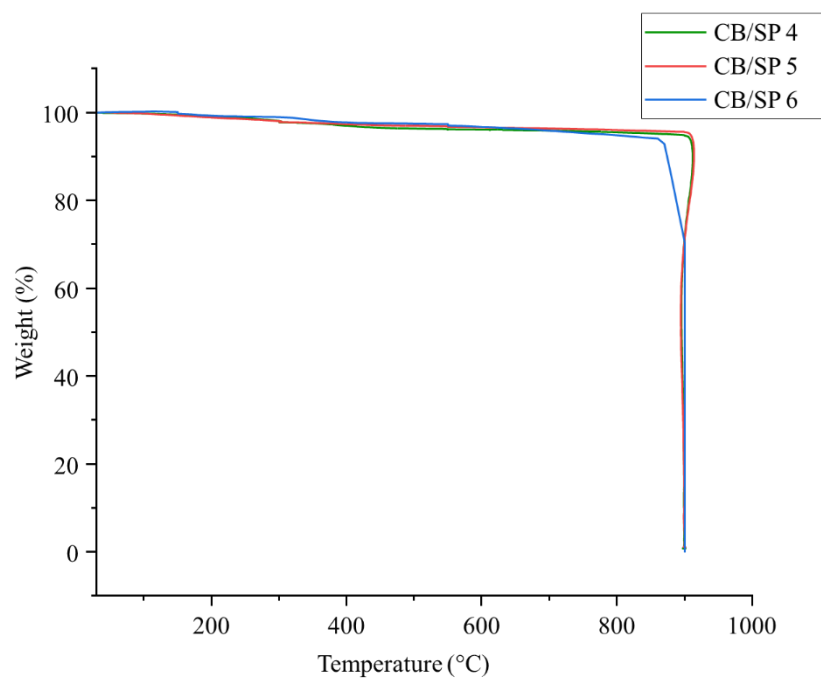

**Figure S2** Thermograph from TGA analysis of CB/SP-4, CB/SP-5 and CB/SP-6.

**Table S1** Structural parameters from X-ray analysis for pristine CB N326 and CB/SP-6 adduct

| Sample    | $d_{002}$ (nm) | $D_{\perp}$ (nm) | $D_{\parallel}$ (nm) | $D_{\parallel} / D_{\perp}$ | $D_{\perp} / d_{002}$ |
|-----------|----------------|------------------|----------------------|-----------------------------|-----------------------|
| CB N326   | 0.34           | 1.51             | 1.54                 | 1.02                        | 4.4                   |
| CB – SP 4 | 0.34           | 1.54             | 2.12                 | 1.38                        | 4.5                   |
| CB – SP 5 | 0.34           | 1.62             | 2.03                 | 1.25                        | 4.7                   |

The Bragg's law was used to determine the interlayer distance and the Scherrer equation to estimate the size of the crystallites, orthogonal ( $D_{\perp}$ ), and parallel ( $D_{\parallel}$ ) to the structural layers, through the peak shape analysis of the (002) reflection ( $D_{\perp}$ ) and the (100) reflection. The ratio ( $D_{\parallel}$ ) / ( $D_{\perp}$ ) gives the shape anisotropy.

**Table S2** Data from the crosslinking of composites of Table 1<sup>a,b</sup>

|                                              | <b>Silica</b> | <b>CB/SP-6</b> |
|----------------------------------------------|---------------|----------------|
| <b>M<sub>L</sub> [dNm]</b>                   | 1.95          | 2.07           |
| <b>M<sub>H</sub> [dNm]</b>                   | 15.4          | 19.74          |
| <b>M<sub>H</sub>-M<sub>L</sub><br/>[dNm]</b> | 13.45         | 17.67          |
| <b>t<sub>s1</sub> [min]</b>                  | 2.44          | 2.12           |
| <b>t<sub>90</sub> [min]</b>                  | 4.02          | 3.43           |
| <b>Curing rate<br/>[dNm/min]<sup>c</sup></b> | 8.51          | 13.48          |

<sup>a</sup> For experimental details see the experimental part

<sup>b</sup> M<sub>L</sub>: minimum modulus, M<sub>H</sub>: maximum modulus, t<sub>s1</sub>: induction crosslinking time, t<sub>90</sub>: optimum crosslinking time,

<sup>c</sup> the curing rate was calculated by means of the following equation:

$$Curing\ Rate = \frac{M_H - M_L}{t_{90} - t_{s1}}$$

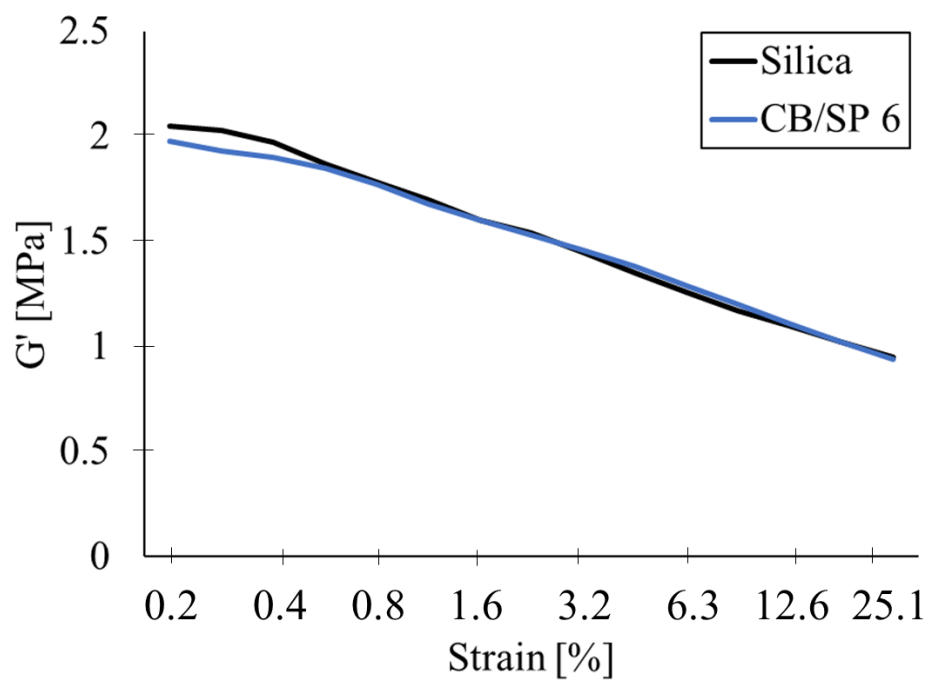

**Figure S3.**  $G'$  vs strain for composites of **Table 1**

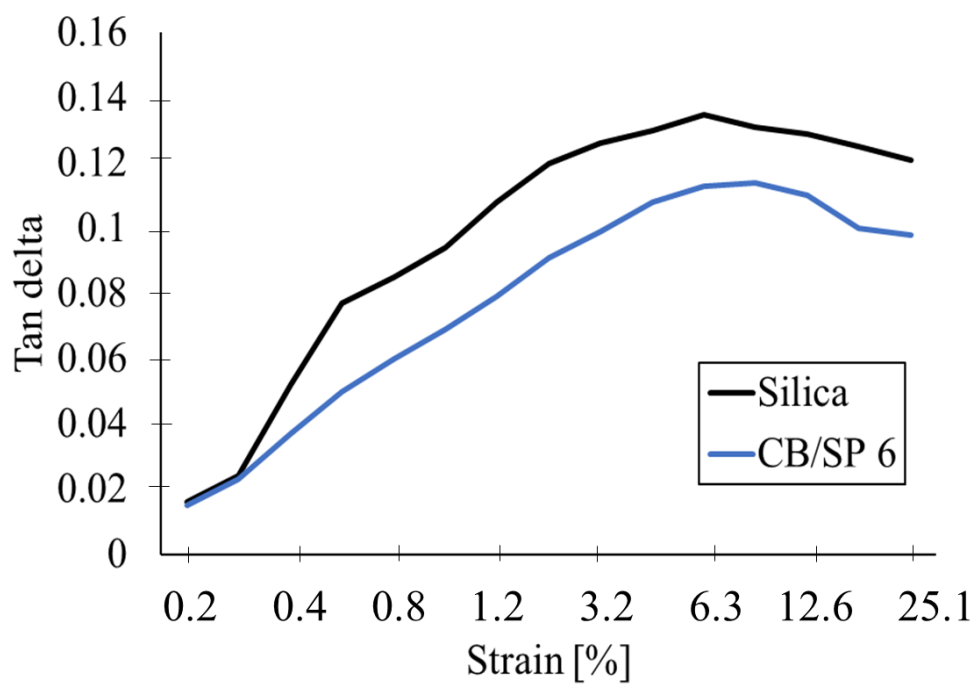

**Figure S4.**  $\tan \delta$  vs strain for composites of **Table 1**

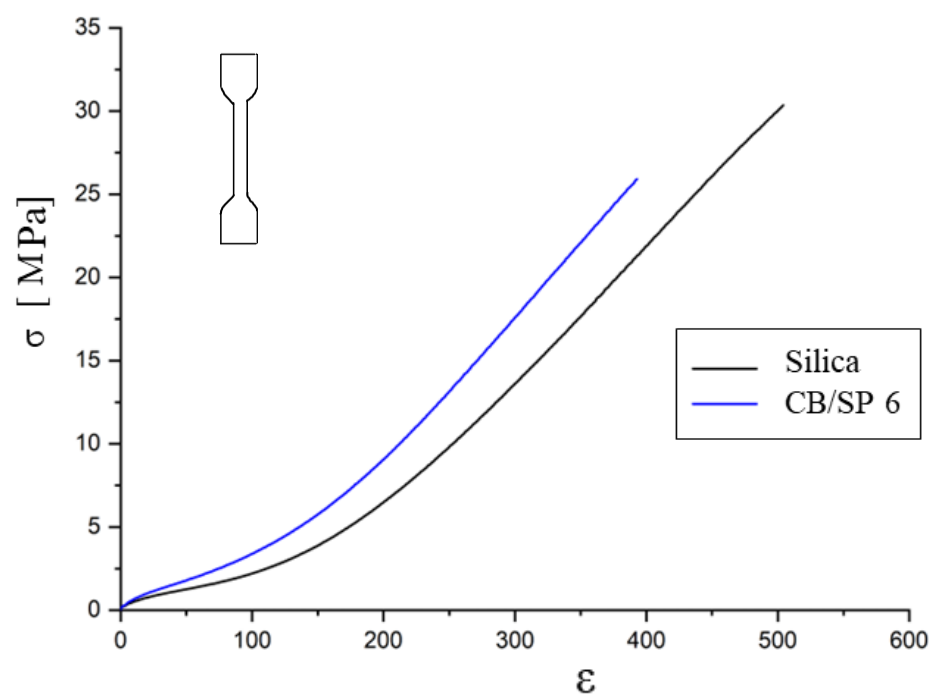

**Figure S5.** Tensile properties for composites of **Table 1**

**Table S3** Data from the crosslinking reaction of composites of Table 2<sup>a,b</sup>

|                                           | <b>Silica</b> | <b>CB/SP-4</b> | <b>CB/SP-5</b> |
|-------------------------------------------|---------------|----------------|----------------|
| <b>M<sub>L</sub> [dNm]</b>                | 3.6           | 2.75           | 3.01           |
| <b>M<sub>H</sub> [dNm]</b>                | 22.42         | 21.21          | 23.29          |
| <b>t<sub>90</sub> [min]</b>               | 4.26          | 4.35           | 4.21           |
| <b>t<sub>s1</sub> [min]</b>               | 2.33          | 2.50           | 2.38           |
| <b>Curing rate [dNm/min] <sup>c</sup></b> | 9.75          | 9.98           | 11.08          |

<sup>a</sup> For experimental details see the experimental part    <sup>b</sup> M<sub>L</sub>: minimum modulus, M<sub>H</sub>: maximum modulus, t<sub>s1</sub>: induction crosslinking time, t<sub>90</sub>: optimum crosslinking time,

<sup>c</sup> the curing rate was calculated by means of the following equation:

$$\text{Curing Rate} = \frac{M_H - M_L}{t_{90} - t_{s1}}$$

**Table S4.** Dynamic-mechanical properties from shear tests of the uncured composites of Table 2.

|                                | <b>Silica</b> | <b>CB/SP-4</b> | <b>CB/SP-5</b> |
|--------------------------------|---------------|----------------|----------------|
| <b>G'<sub>0.2%</sub> [MPa]</b> | 1.43          | 1.16           | 1.15           |
| <b>G'<sub>25%</sub> [MPa]</b>  | 0.35          | 0.30           | 0.31           |
| <b>ΔG' [MPa]</b>               | 1.08          | 0.86           | 0.84           |
| <b>ΔG'/G'<sub>0.2%</sub></b>   | 0.76          | 0.74           | 0.73           |
| <b>G''<sub>max</sub> [MPa]</b> | 0.42          | 0.33           | 0.31           |
| <b>Tan(δ)<sub>max</sub></b>    | 0.45          | 0.44           | 0.42           |

**Table S5.** Dynamic-mechanical properties from shear tests of the cured composites of Table 2

|                                | <b>Silica</b> | <b>CB/SP-4</b> | <b>CB/SP-5</b> |
|--------------------------------|---------------|----------------|----------------|
| <b>G'<sub>0.2%</sub> [MPa]</b> | 4.03          | 3.47           | 3.84           |
| <b>G'<sub>25%</sub> [MPa]</b>  | 1.25          | 1.18           | 1.30           |
| <b>ΔG' [MPa]</b>               | 3.09          | 2.54           | 2.74           |
| <b>ΔG'/G'<sub>0.2%</sub></b>   | 0.77          | 0.73           | 0.71           |
| <b>G''<sub>max</sub> [MPa]</b> | 0.47          | 0.38           | 0.41           |
| <b>Tan(δ)<sub>max</sub></b>    | 0.21          | 0.19           | 0.19           |

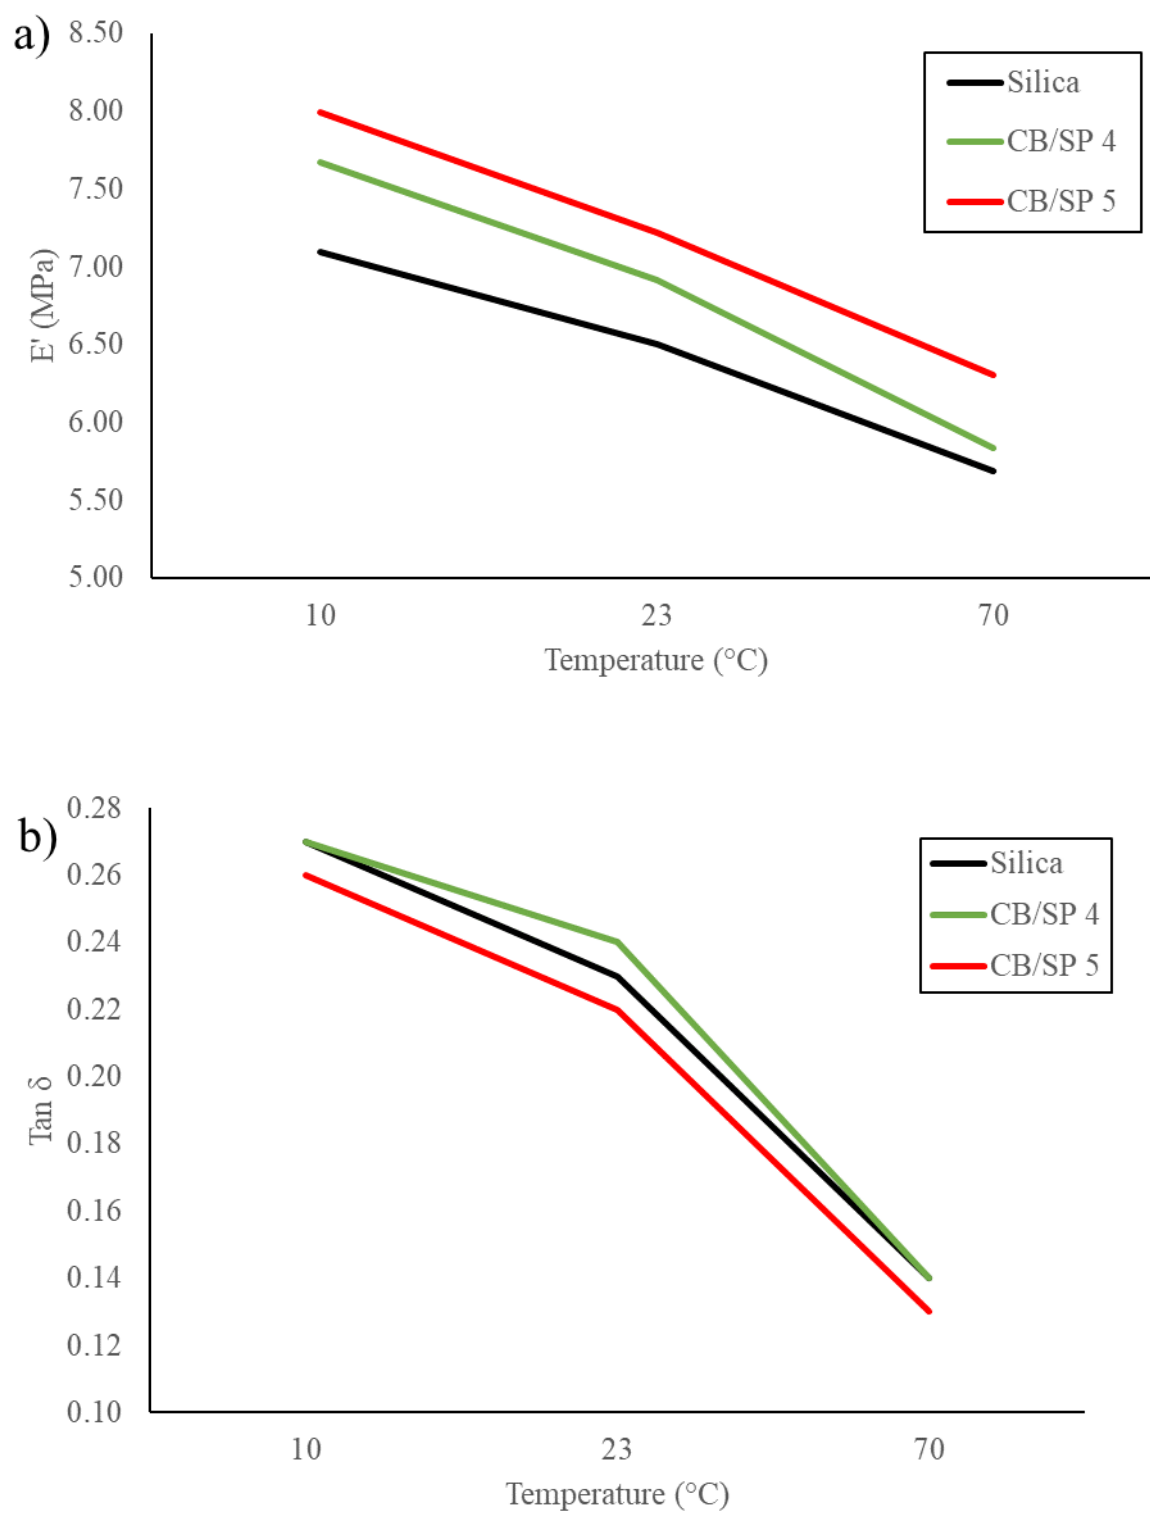

**Figure S6** Storage modulus (a) and  $\tan \delta$  (b) curves of IR composites.



**Table S6** Tensile properties of composites of **Table 2**

|                                               | <b>Reference</b> | <b>CB/SP-4</b> | <b>CB/SP-5</b> |
|-----------------------------------------------|------------------|----------------|----------------|
| <b><math>\sigma_{50}</math> [MPa]</b>         | 1.54             | 1.69           | 1.91           |
| <b><math>\sigma_{100}</math> [MPa]</b>        | 2.56             | 2.95           | 3.48           |
| <b><math>\sigma_{300}</math> [MPa]</b>        | 12.60            | 14.67          | 16.44          |
| <b><math>\sigma_{300}/\sigma_{100}</math></b> | 4.92             | 4.97           | 4.72           |
| <b><math>\sigma_b</math> [MPa]</b>            | 24.19            | 25.39          | 25.70          |
| <b><math>\varepsilon_b</math> [%]</b>         | 487.89           | 456.63         | 436.35         |
| <b>Energy [MJ/m<sup>3</sup>]</b>              | 50.18            | 49.66          | 49.84          |

**Table S7** Optic microscopy CB dispersion results of IR-based rubber composites

|                                                        | <b>Silica</b> | <b>CB/SP 4</b> | <b>CB /SP 5</b> |
|--------------------------------------------------------|---------------|----------------|-----------------|
| <b>Filler</b>                                          | CB            | CB             | CB              |
| <b>Filler %</b>                                        | 16            | 28             | 28              |
| <b>N° Aggregates</b>                                   | 10            | 4              | 16              |
| <b>Average diameter<br/>[<math>\mu\text{m}</math>]</b> | 16.9          | 21.1           | 19.7            |
| <b>Undispersed filler<br/>%</b>                        | 0.27          | 0.16           | 0.32            |
